# Supplementary material for: The relationship between chronotype and intelligence: the importance of work timing
Source: PubMed Central journal article supplement (PMC7188801; doi:10.1038/s41598-020-62917-9), 2020-04-28
Supplement: 41598_2020_62917_MOESM1_ESM.pdf [file 41598_2020_62917_MOESM1_ESM.pdf]

# The relationship between chronotype and intelligence: the importance of work timing

Péter P. Ujma<sup>1,2</sup>, Tanja G. Baudson<sup>3,4</sup>, Róbert Bódizs<sup>1,2</sup>, Martin Dresler<sup>5</sup>

1 Institute of Behavioural Sciences, Semmelweis University, Budapest, Hungary

2 National Institute of Clinical Neuroscience, Budapest, Hungary

3 Mensa in Germany, Cham, Germany

4 Institute for Globally Distributed Open Research and Education (IGDORE)

5 Donders Institute for Brain, Cognition and Behaviour, Radboud University Medical Centre, Nijmegen, Netherlands

Correspondence:

Róbert Bódizs, bodizs.robert@med.semmelweis-univ.hu

**Supplementary table S1. Descriptive statistics for covariates.**

|               |                    | N   | Minimum  | Maximum  | Mean     | SD       |
|---------------|--------------------|-----|----------|----------|----------|----------|
| Mensa members | Work start time    | 481 | 04:00:00 | 15:00:00 | 08:35:23 | 01:18:15 |
|               | Commute duration   | 483 | 0.0      | 120.0    | 22.8     | 19.6     |
|               | Cigarettes/day     | 515 | 0.0      | 40.0     | 1.2      | 4.6      |
|               | Beer/day           | 515 | 0.0      | 12.6     | 0.3      | 0.8      |
|               | Glass wine/day     | 515 | 0.0      | 4.3      | 0.2      | 0.5      |
|               | Liquor/day         | 515 | 0.0      | 2.0      | 0.1      | 0.2      |
|               | Coffee/day         | 515 | 0.0      | 13.6     | 1.5      | 1.8      |
|               | Caffeine drink/day | 515 | 0.0      | 14.3     | 0.4      | 1.3      |
|               | Tea/day            | 515 | 0.0      | 14.3     | 0.6      | 1.6      |
|               | Hypnotic/day       | 515 | 0.0      | 1.0      | 0.0      | 0.2      |
| Controls      | Work start time    | 272 | 5:30:00  | 16:00:00 | 8:21:23  | 1:21:06  |
|               | Commute duration   | 275 | 0.0      | 100.0    | 24.2     | 18.8     |
|               | Cigarettes/day     | 293 | 0.0      | 28.6     | 2.5      | 5.8      |
|               | Beer/day           | 294 | 0.0      | 14.3     | 0.4      | 1.1      |
|               | Glass wine/day     | 294 | 0.0      | 2.9      | 0.3      | 0.4      |
|               | Liquor/day         | 294 | 0.0      | 1.4      | 0.1      | 0.2      |
|               | Coffee/day         | 294 | 0.0      | 10.0     | 1.9      | 1.7      |
|               | Caffeine drink/day | 294 | 0.0      | 7.1      | 0.3      | 0.8      |
|               | Tea/day            | 294 | 0.0      | 7.1      | 0.5      | 1.0      |
|               | Hypnotic/day       | 294 | 0.0      | 1.0      | 0.0      | 0.1      |
